1     **Noncovalent antibody catenation on a target surface drastically increases**  
2                                   **the antigen-binding avidity**

3             Jinyeop Song<sup>2,4,†</sup>, Bo-Seong Jeong<sup>1,4</sup>, Seong-Woo Kim<sup>1</sup>, Seong-Bin Im<sup>1</sup>, Wonki Cho<sup>1</sup>,  
4                                   Myung-Ju Ahn<sup>3</sup>, Byung-Ha Oh<sup>1,\*</sup>

5     <sup>1</sup>Department of Biological Sciences, KAIST Institute for the Biocentury, Korea Advanced  
6     Institute of Science and Technology, Daejeon 34141, Republic of Korea;

7     <sup>2</sup>Department of Physics, Korea Advanced Institute of Science and Technology, Daejeon  
8     34141, Republic of Korea;

9     <sup>3</sup>Department of Medicine, Samsung Medical Center, Sungkyunkwan University School of  
10    Medicine, Seoul 06351, Republic of Korea;

11    <sup>4</sup>These authors contributed equally.

12    <sup>†</sup>Present address: Department of Physics, Massachusetts Institute of Technology, Cambridge,  
13    MA, USA

14

15    \*Corresponding author (e-mail: [bhoh@kaist.ac.kr](mailto:bhoh@kaist.ac.kr))

16

17

18

19

20

21 **ABSTRACT**

22 Immunoglobulin G (IgG) antibodies are widely used for diagnosis and therapy. Given the  
23 unique dimeric structure of IgG, we hypothesized that, by genetically fusing a homodimeric  
24 protein (catenator) to the C-terminus of IgG, reversible catenation of antibody molecules  
25 could be induced on a surface where target antigen molecules are abundant, and that it could  
26 be an effective way to greatly enhance the antigen-binding avidity. A thermodynamic  
27 simulation shows that quite low homodimerization affinity of a catenator, *e.g.* dissociation  
28 constant of 100  $\mu$ M, can enhance nanomolar antigen-binding avidity to a picomolar level, and  
29 that the fold enhancement sharply depends on the density of the antigen. In a proof-of-  
30 concept experiment where antigen molecules are immobilized on a biosensor tip, C-terminal  
31 fusion of a weakly homodimerizing protein to two different antibodies enhanced the antigen-  
32 binding avidity by at least 210 to 5,120 folds from the intrinsic binding avidity. Thus, the  
33 homodimerization-induced antibody catenation would be a simple, powerful and general  
34 approach to improve many antibody applications, including the detection of scarce  
35 biomarkers and targeted anticancer therapies.

36

37 **Keywords**

38 IgG antibody, on-target antibody catenation, enormous avidity enhancement, innovative  
39 technology, anticancer therapy

40

## 41 **INTRODUCTION**

42 Immunoglobulin G (IgG) antibodies have become the principal therapeutic biologic. IgG  
43 antibodies are a homodimer of a heterodimer composed of two copies of each heavy chain  
44 (~50 kDa) and light chain (~25 kDa). They have two functional regions: the antigen-binding  
45 fragment (Fab) region at the N-terminal end and the fragment crystallizable (Fc) region at the  
46 C-terminal end. With an overall shape of the letter Y, the two identical regions of Fab form  
47 two arms that can bind two antigen molecules. This antibody-antigen engagement could  
48 prevent the antigen from binding to cognate partners or eliminate the antigen molecules from  
49 the cell surface by receptor-mediated endocytosis (Liu, 2018). The two copies of Fc form a  
50 homodimeric tail that enables a long half-life via binding to the neonatal Fc receptor (FcRn)  
51 and exerts effector functions via binding to the Fc $\gamma$  receptors on effector immune cells or the  
52 complement factor C1q (Hogarth and Pietersz, 2012, Lee et al., 2017), which could lead to  
53 the death of cells to which antibody molecules are bound (Carter and Lazar, 2018, Goydel  
54 and Rader, 2021, Jiang et al., 2011).

55 IgG antibodies have desirable properties for use as a therapeutic drug, including high  
56 specificity for a target antigen, low immunogenicity and long serum half-life (Weiner et al.,  
57 2010). On the other hand, therapeutic monoclonal antibodies (mAbs) show side effects, albeit  
58 to a lesser degree in comparison with conventional chemotherapeutics, such as low or high  
59 blood pressure and kidney damage (Hansel et al., 2010). In the case of targeted cancer  
60 therapy, where mAbs target a specific antigen on cancer cells, the side effects likely arise due  
61 to the expression of the target antigen not only on cancer cells but also on normal cells, which  
62 therefore are targeted indiscriminately by mAbs administered in patients (Scott et al., 2012).  
63 Moreover, mAbs often suffer from shortcomings such as moderate therapeutic efficacy

64 (resulting in the development of resistance) and their efficacy in a fraction of patients (as  
65 observed for mAbs against immune checkpoint inhibitors) (Aldeghaither et al., 2019, Hansel  
66 et al., 2010, Wang et al., 2021). Insufficient blockade of target antigens for various reasons,  
67 including insufficient antigen-binding affinity, could be responsible for the moderate  
68 therapeutic efficacy.

69 In general, diagnostic and therapeutic antibodies are required to exhibit low  
70 nanomolar or higher antigen-binding affinity ( $K_D < 10$  nM) (Sliwkowski and Mellman, 2013).  
71 To reach this level of affinity, laborious experiments for affinity maturation are usually  
72 followed after an initial discovery of an antibody (Hoogenboom, 2005). Increasing the  
73 valency of binding interaction could be a method of choice. It was shown that irreversibly  
74 dimerized monovalent binders can bind targets significantly better than monomeric  
75 counterparts (Foreman, 2017). This enhancement of the binding affinity arises from the  
76 proximity effect, where the binding of one subunit of the dimer to a target restricts the search  
77 space for the other subunit. Reversibly dimerized binders could also exhibit significantly  
78 enhanced binding affinity depending on the affinity for binder-target interaction, affinity for  
79 homodimerization and the length of the connecting linker, as predicted by a reacted-site  
80 probability approach (Foreman, 2017). Such approaches to increase the valency of binding  
81 have been applied to IgG antibodies, and a considerable increase in the antigen-binding  
82 affinity was observed *in vitro* (White et al., 2014). However, as the size of an IgG-type  
83 antibody is large (~150 kDa), irreversible cross-linking or tight reversible dimer formation of  
84 the antibody would result in poor solubility and tissue penetration *in vivo*.

85 Owing to the overall dimeric structure, IgG antibodies genetically fused to a  
86 homodimeric protein at the C-terminus can be catenated in an arm-in-arm fashion as long as

87 the homodimer can be formed, not within an antibody molecule, but between two antibody  
88 molecules. In theory, it would be possible to generate a soluble fusion protein that remains  
89 monomeric in solution, but becomes catenated by the proximity effect on a cell surface where  
90 target antigen molecules are abundant, provided that the fused protein has appropriately low  
91 homodimerization affinity. Importantly, this proximity effect-driven catenation, in turn,  
92 should result in enhanced bivalent antigen-binding affinity (=avidity). In this work, by agent-  
93 based modeling (ABM) and proof-of-concept experiments, we demonstrate that antibody  
94 catenation induced by the intermolecular homodimerization can enormously enhance the  
95 antigen-binding avidity of an antibody on a target surface.

96

## 97 **RESULTS**

### 98 **The concept of antibody catenation on a target surface**

99 This concept was based on (i) the unique dimeric structure of the IgG-type antibody and (ii) a  
100 proximity effect that potentially takes place on a target cell surface. In the structure of IgG,  
101 the Fc domain is composed of two copies of the constant regions of the heavy chain ( $C_{H2}$  and  
102  $C_{H3}$ ) forming a homodimer, in which the two C-termini are  $\sim 23$  Å apart and point away from  
103 each other (Figure 1A, *Left*). This structural feature indicated that a homodimer-forming  
104 protein genetically fused to the C-terminus can be prevented from forming a homodimer  
105 intramolecularly by controlling the length of the connecting linker or its homodimerization  
106 affinity. Instead, the fusion protein can form a homodimer intermolecularly, and then such a  
107 homodimerization could result in a catenation of the antibody molecules (Figure 1A, *Right*).  
108 We designate the fusion protein between an antibody and a homodimeric protein as antibody-  
109 catenator ( $^{cat}Ab$ ). A proximity effect for  $^{cat}Ab$  is expected on a target surface where multiple  
110 copies of target antigen are present, because the local concentration of  $^{cat}Ab$  on the surface  
111 will increase owing to the antibody-antigen binding interaction. Consequently, the  
112 homodimerization between the catenator molecules will increase to form catenated antibodies  
113 in an arm-in-arm fashion (Figure 1B). Importantly, the effective antigen-binding affinity of  
114  $^{cat}Ab$  will increase in parallel with the catenation, and the fold enhancement would depend on  
115 the degree of the catenation. Thus, it appeared possible to enhance the antigen-binding  
116 avidity of the IgG-type antibodies by genetically fusing a weakly homodimer-forming protein.

117

### 118 **Agent-based modeling to simulate the behavior of $^{cat}Ab$**

119 ABM is a computational modeling approach that has been employed in a variety of research  
120 areas, including statistical physics (Perc et al., 2017, Fu and Wang, 2008) and biological  
121 sciences (An et al., 2009, Metzcar et al., 2019, McLane et al., 2011). ABM enables the  
122 understanding of macroscopic behaviors of a complex system by defining a minimal set of  
123 rules governing microscopic behaviors of agents which compose the system.

124 We constructed an ABM to simulate the behavior of the <sup>cat</sup>Ab molecules on a target  
125 surface, where target antigen (Ag) molecules form antibody-binding sites. To circumvent  
126 complexity, we presumed that each binding site is a pair of two antigen molecules (2Ag), and  
127 <sup>cat</sup>Ab make a bivalent interaction with the binding site in a 1:1 stoichiometry to form an  
128 occupied binding site (<sup>cat</sup>Ab-2Ag) (Figure 2A, *Left*). For catenation to occur between two  
129 adjacent <sup>cat</sup>Ab-2Ag complexes, the distance between the centers of two adjacent complexes ( $d$ )  
130 should be closer than the reach length ( $L$ ) defined as  $l+c/2$ , the sum of the linker length ( $l$ )  
131 and the half the catenator length ( $c$ ) (Figure 2A, *Right*). Therefore, multiple parameters affect  
132 the catenation on the target surface. In our ABM model, we regarded every possible binding  
133 site on the target surface as an individual agent in the ABM formalism, and each binding site  
134 is assigned to a fixed position on a three-dimensional (3D) surface with a periodic boundary  
135 condition. Three rules in our ABM govern the behaviors of the <sup>cat</sup>Ab molecules on the target  
136 surface. The first rule is about the *intrinsic antibody-antigen binding*. An unoccupied binding  
137 site binds to one free <sup>cat</sup>Ab through bivalent interaction to form an occupied binding site.  
138 Bound <sup>cat</sup>Ab may dissociate from the occupied binding site, leaving the binding site  
139 unoccupied. The equilibrium population of the occupied and unoccupied binding sites is  
140 determined by the antibody's intrinsic avidity for the antigen with no effect of the catenator  
141 on the antigen-binding avidity assumed. Then, the relative likelihood of the occupied state  
142 compared to the unoccupied state for any binding site (the likelihood of intrinsic antigen

143 binding) is defined as  $[\text{catAb-2Ag}]/[2\text{Ag}]$  and thus can be expressed as  $[\text{catAb}]/K_D$ , where  
144  $[\text{catAb}]$  is the concentration of  $\text{catAb}$  and  $K_D$  is the dissociation constant for the bivalent  $\text{catAb-}$   
145  $2\text{Ag}$  interaction (Figure 2B, *Left*). The second rule is about *catenation*. A pair of  $\text{catAb-2Ag}$   
146 complexes on the target surface can be bridged by intermolecular homodimerization between  
147 catenators (Figure 2B, *Middle*). For a pair of  $\text{catAb-2Ag}$  complexes separated by  $d$  (Figure 2A,  
148 *Right*), the relative likelihood of the catenation state as compared to the non-catenation state  
149 is the ratio of the forward reaction rate (catenation) to the reverse reaction rate (decatenation).  
150 The forward reaction rate ( $R_{\text{catenation}}$ ) and the reverse reaction rate ( $R_{\text{decatenation}}$ ) are given as,

$$R_{\text{catenation}} = (k_f)_{\text{catenation}} * \left( \frac{1}{N_A} * \frac{1}{V_{\text{sphere}}} \right)^2 * V_{\text{overlap}}(d)$$

$$R_{\text{decatenation}} = (k_r)_{\text{catenation}} * \frac{1}{N_A}$$

151 , where  $k_f$  and  $k_r$  are the reaction rate constant of the forward and reverse reaction,  
152 respectively,  $N_A$  is the Avogadro number,  $V_{\text{sphere}}$  is the local spherical volume within the  
153 reach of the catenator, and  $V_{\text{overlap}}(d)$  is the volume where two catenators can come in contact  
154 to form a homodimer (Figure 2A, *Right*). In approximating the forward reaction rate, the  
155 catenator was assumed to sample  $V_{\text{sphere}}$  uniformly. The relative likelihood, defined as  
156  $R_{\text{catenation}}/R_{\text{decatenation}}$ , is then expressed as

$$157 \frac{R_{\text{catenation}}}{R_{\text{decatenation}}} = \frac{(k_f)_{\text{catenator}}}{(k_r)_{\text{catenator}}} * \frac{1}{N_A} * \left( \frac{1}{V_{\text{sphere}}} \right)^2 * V_{\text{overlap}}(d) = \frac{f(d)}{(K_D)_{\text{catenator}}}$$

158 where

$$f(d) = \frac{1}{N_A} * \left( \frac{1}{V_{\text{sphere}}} \right)^2 * V_{\text{overlap}}(d)$$

159 The relative likelihood is thus a function of  $d$ , and it is inversely proportional to the  
160 dissociation constant of the catenator in the bulk medium,  $(K_D)_{\text{catenator}}$ . The function  $f(d)$  can



161 be viewed as the effective local concentration of the catenator in  $V_{\text{overlap}}(d)$ . As expected,  $f(d)$   
162 and thus the relative likelihood is sensitively affected by the reach length and limited by the  
163  $^{\text{cat}}\text{Ab}$ - $^{\text{cat}}\text{Ab}$  distance (Figure 2—figure supplement 1). Finally, the third rule is about *restricted*  
164 *dissociation* which assumes that catenated antibodies are not allowed to dissociate from the  
165 binding site, because the catenated arms would hold the dissociated antibody near its binding  
166 site, forcing it to rebind immediately (Liese and Netz, 2018). Under this assumption, antibody  
167 molecules are allowed to dissociate from the binding site, only if its catenator is not engaged  
168 in the homodimerization with nearby  $^{\text{cat}}\text{Ab}$ -2Ag complexes (Figure 2B, *Right*).

169

#### 170 **Simulations show significant enhancement of the antigen-binding avidity**

171 According to the postulated rules, we simulated the effects of the antibody catenation on the  
172 binding interaction between  $^{\text{cat}}\text{Ab}$  and 2Ag on a three-dimensional surface by using the  
173 Markov Chain Monte-Carlo (MCMC) sampling method (Hooten and Wikle, 2010) (see  
174 Methods section). Our sampling procedure is composed of three steps (Figure 2C). The first  
175 step is an *initialization*, where a target surface with the antibody-binding sites is defined by  
176 specifying the coordinates for each site. A set of binding sites are positioned equidistant from  
177 each other or randomly positioned, and the inter-site distance or the number of binding sites  
178 were set as variables. The next step is an *MCMC stochastic update* step. In each iteration, a  
179 binding site is randomly selected from the target surface, and the probability of changing the  
180 status of the selected binding site (occupied or not) is calculated by the Metropolis-Hasting  
181 algorithm (Hastings, 1970, Grazzini et al., 2017). Then, the ‘on’ or ‘off’ state of this site is  
182 updated with the calculated probability. Accordingly, the catenation state is probabilistically  
183 updated for each update step. In the following sampling step, the total number of the  
184 occupied binding sites is counted, which is then collected through multiple simulation runs

185 for the statistical analysis of the binding site occupancy and the effective antigen-binding  
186 avidity. The binding site occupancy is the mean value of the number of occupied binding  
187 sites collected for more than 1024 MCMC samplings. For each simulation, we calculated the  
188 mean binding occupancy and the effective dissociation constant,  $(K_D)_{eff}$ , which takes into  
189 account the effect of the antibody catenation, and is expressed as:

$$(K_D)_{eff} = \frac{(1 - \text{Binding Site Occupancy}) * [^{cat}Ab]}{\text{Binding Site Occupancy}}$$

190 Since the catenator homodimerization should be affected by how the binding sites are  
191 distributed on a 3D surface, simulations were conducted for different arrays of binding sites.  
192 In the simulations,  $(K_D)_{catenator}$  was the main variable, while other parameters were set  
193 constant. First, we simulated the binding sites forming a square lattice to find that the Ab-  
194 catenator exhibited enhanced binding site occupancy in a sigmoidal manner, and that it could  
195 be enhanced to near full saturation by a catenator that forms a homodimer with quite low  
196 binding affinity. For instance, a  $^{cat}Ab$  with  $(K_D)_{catenator}$  of  $\sim 1 \mu M$  exhibited  $\sim 70$ -fold  
197 enhancement of the effective antigen-binding avidity (=reduction of  $(K_D)_{eff}$ ) in comparison  
198 with the same antibody without a fused catenator (Figure 3). As a means of comparison  
199 across different simulation setups, we employed ' $(K_D)_{catenator,50}$ ' which is defined as the  
200  $(K_D)_{catenator}$  that enables half-maximal enhancement of the binding site occupancy (Figure 3).

201

## 202 **Comparison of the simulations for different arrays of the binding sites**

203 Next, we carried out simulations for other regular arrays of the binding sites and for randomly  
204 distributed binding sites. Depending on the pattern of regularly distributed binding sites, the  
205 number of possible catenations for a given binding site (designated as connectivity number)  
206 varies: 3, 4 and 6 for a hexagonal, square or triangular array of the binding sites, respectively

207 (Figure 4A). These three arrays showed varying but similar enhancement of the binding site  
208 occupancy and the effective antigen-binding avidity by the catenator (Figure 4A). As  
209 expected, the higher the connectivity number was, the lower  $(K_D)_{\text{catenator},50}$  an array exhibited;  
210 the  $(K_D)_{\text{catenator},50}$  was 8.0, 9.2 and 12.2  $\mu\text{M}$  for the hexagonal, square and triangular array of  
211 the binding sites, respectively. The simulations showed that, as the connectivity number  
212 increased, the effective antigen-binding avidity increased with the maximum 41-, 73- and 93-  
213 fold enhancement for the triangular, square and hexagonal array, respectively (Figure 4A).  
214 Thus, regardless of the distribution patterns, the effective antigen-binding avidity could be  
215 increased by at least 41 folds under the simulation conditions where the target surface  
216 contains only 98 binding sites.

217 For the case of randomly distributed binding sites on a 3D surface, which is relevant  
218 to target antigen distribution on cell surfaces, we introduced the binding site density ( $\rho$ ), the  
219 number of binding sites per unit area which is set to the square of the reach length (7 nm)  
220 (Figure 4B). In the simulations, the total surface area was 5,760  $\text{nm}^2$ , and the number of  
221 binding sites was 15, 30, 45, 90 or 120, which correspond to the  $\rho$  of 1.47, 2.94, 4.41, 8.82 or  
222 11.76. Denser binding sites would increase the connectivity number for a given binding site.  
223 As expected, simulations showed that higher binding site density resulted in a higher level of  
224 binding site saturation and a much more significant increase in the effective antigen-binding  
225 avidity; the maximum fold enhancement ranged from 15 ( $\rho= 1.47$ ) to 1,062 ( $\rho= 11.76$ ).  
226 Likewise, significantly different  $(K_D)_{\text{catenator},50}$  values were observed: *e.g.*,  $4.2 \times 10^{-6}$  M at the  $\rho$   
227 of 11.76 *versus*  $74 \times 10^{-6}$  M at the  $\rho$  of 1.47 (Figure 4B). The maximal saturation and the onset  
228  $(K_D)_{\text{catenator}}$ , which begins to exert the catenation effect, were also considerably different. Thus,  
229 the catenation effects are sensitively affected by the binding site density, in contrast with the  
230 all-or-none catenation effect observed for the regular arrays of the binding sites (Figure 4B).

231 In particular, the catenation-induced enhancement of the antigen-binding avidity was  
232 remarkably and sensitively affected by the  $(K_D)_{\text{catenator}}$  values at high binding site density ( $\rho >$   
233 4.41) (Figure 4B). Much greater enhancement was observed as we further increased the  
234 density of randomly distributed binding sites: ~29,000 maximum fold enhancement at the  $\rho$   
235 of 58.8 (Figure 4—figure supplement 1), which roughly corresponds to two hundredths of the  
236 density of the HER2 receptor on HER2-overexpressing breast cancer cells (Peckys et al.,  
237 2019). Together, our simulations show that randomly distributed binding sites at high density  
238 enormously enhance the effective antigen-binding avidity of  $^{\text{cat}}\text{Ab}$ .

239 Additionally, we performed simulations for different values of  $[^{\text{cat}}\text{Ab}]/K_D$  to estimate  
240 the effect of  $K_D$  with respect to  $[^{\text{cat}}\text{Ab}]$ . Varying  $[^{\text{cat}}\text{Ab}]/K_D$  from 0.01 to 1.0 resulted in 85- to  
241 900-fold enhancement of the antigen-binding avidity, suggesting that the catenation effect  
242 works for a broad range of  $K_D$  values (Figure 4—figure supplement 2).

243

#### 244 **Proof-of-concept experiments**

245 For experimental validation, we chose stromal cell-derived factor 1 $\alpha$  (SDF-1 $\alpha$ ) as a catenator.  
246 SDF-1 $\alpha$  is a small ( $M_r = 8$  kDa) and weakly homodimerizing protein ( $K_D = 150$   $\mu\text{M}$ )  
247 (Veldkamp et al., 2005), indicating that this protein fused to an antibody by a ~40 Å-long  
248 linker would not form an intramolecular homodimer within a fusion protein. By using a 10-  
249 residue connecting linker (GGGGSGGGSGG), SDF-1 $\alpha$  was fused to two different antibodies:  
250 Trastuzumab(N30A/H91A), a variant of the clinically used anti-HER2 antibody Trastuzumab  
251 and gICV30, an antibody against the receptor-binding domain (RBD) of the severe acute  
252 respiratory syndrome coronavirus 2 (SARS-CoV-2) spike protein. The Fab fragment of  
253 Trastuzumab(N30A/H91A) binds to the ectodomain of HER2 with a  $K_D$  of 353 nM (Slaga et  
254 al., 2018), and gICV30 binds to the RBD with a similar binding affinity ( $K_D = 407$  nM)

255 (Hurlburt et al., 2020). We produced the SDF-1 $\alpha$ -fused antibodies,  
256 Trastuzumab(N30A/H91A)-SDF-1 $\alpha$  and gICV-SDF-1 $\alpha$ , and also the unmodified antibodies  
257 to compare their binding avidities by bio-layer interferometry (BLI) where respective target  
258 antigen was immobilized on a sensor tip. Unlike the similar antigen-binding affinities of the  
259 Fab fragments, the binding avidities of the full-form antibodies were quite different in our  
260 quantification, Trastuzumab(N30A/H91A) and gICV30 exhibiting the  $K_D$  of 2.1 nM and 51.2  
261 nM, respectively (Figure 5). The SDF-1 $\alpha$ -fused antibodies exhibited association kinetics  
262 similar to those of the mother antibodies; association rate constants ( $k_a$ s) of the  
263 Trastuzumab(N30A/H91A) and Trastuzumab(N30A/H91A)-SDF-1 $\alpha$  were  $1.5 \times 10^5 \text{ Ms}^{-1}$  and  
264  $3.1 \times 10^5 \text{ Ms}^{-1}$ , respectively. Similarly, those of gICV30 and gICV30-SDF-1 $\alpha$  were  $25.0 \times 10^4$   
265  $\text{Ms}^{-1}$  and  $5.0 \times 10^4 \text{ Ms}^{-1}$ , respectively. However, the two pairs of the antibodies exhibited  
266 significantly different dissociation kinetics; dissociation rate constants ( $k_d$ s) of the  
267 Trastuzumab(N30A/H91A) pair were  $3.1 \times 10^{-4} \text{ Ms}^{-1}$  *versus*  $< 1.0 \times 10^{-7} \text{ Ms}^{-1}$  and  
268 those for the gICV30 pair were  $1.3 \times 10^{-4} \text{ Ms}^{-1}$  *versus*  $< 1.0 \times 10^{-7} \text{ Ms}^{-1}$  (Figure 5). These  
269 observed kinetics are consistent with the expectation that fused SDF-1 $\alpha$  would not affect the  
270 association of the antibodies, but would slow down the dissociation of the SDF-1 $\alpha$ -fused  
271 antibodies into the bulk solution, as it catenates the antibody molecules on the sensor tip. As a  
272 result, Trastuzumab(N30A/H91A)-SDF-1 $\alpha$  exhibited the  $K_D$  of  $< 10 \text{ pM}$ , at least 210-fold  
273 higher binding avidity compared with Trastuzumab(N30A/H91A), and likewise, The SDF-1 $\alpha$   
274 fusion to gICV30 increased the binding avidity by at least 5,120 folds, demonstrating that  
275 two-digit nanomolar binding avidity of an antibody can be increased to picomolar binding  
276 avidity by fusing a weakly homodimerizing protein.

277

## 278 **DISCUSSION**

279 In the current phage display for antibody screening, many candidates that do not satisfy a  
280 required affinity for a target antigen are rejected, although they might have high specificity of  
281 binding. A simple and general way of increasing the antigen-binding affinity of antibodies  
282 would be highly valuable for various applications of antibodies. Taking advantage of the  
283 particular homodimeric structure of IgG antibodies, we put forth a concept to enhance the  
284 bivalent antigen-binding interaction by fusing a weakly homodimerizing protein to the C-  
285 terminus of Fc. The validity of the concept was tested by simulations based on an ABM and  
286 supported by experimental demonstrations.

287 Our ABM with the three postulated rules was the basis for predicting the  
288 enhancement of effective antigen-binding avidity. The model has caveats. First, the  
289 assumption of uniform density for the fused catenators within a sphere oversimplifies the  
290 dynamics of the catenators, which would highly depend on physical contexts, such as  
291 molecular orientations and potential intramolecular interaction with the antibody (Zhou,  
292 2001). Second, the binding sites representing antigens are fixed on a surface in our model, but  
293 in real situations, antigens move their positions, *e.g.*, receptor molecules on cellular  
294 membranes (Saxton and Jacobson, 1997). Advanced molecular dynamics simulations  
295 incorporated into the ABM would take account of these microscopic details to result in a  
296 more accurate prediction of the behaviors of the <sup>cat</sup>Ab molecules and the binding sites.  
297 Despite these caveats, the simulations provided valuable insights into the proper ranges of the  
298 antigen-binding avidity of an antibody and catenator-catenator binding affinity. According to  
299 the simulation, we adopted SDF-1 $\alpha$ , a weakly homodimerizing protein ( $K_b$  of 150 nM), as a  
300 catenator. When fused to antibodies, it resulted in remarkable enhancement of the effective

301 antigen-binding avidity of the antibodies, which was due to drastically reduced rate of  
302 dissociation of the fused antibody molecules from the immobilized antigens.

303         The “antibody catenation on a target surface” method presented herein might find  
304 practical applications. First, it can be applied to therapeutic antibodies against viruses, which  
305 have multiple copies of target antigens on their surface. Second, it can be used for sandwich-  
306 type point-of-care biosensors in which a second antibody is catenated to increase the  
307 sensitivity of detection. Third, this method can be used to sense biomarkers that exist in a  
308 very low number on a target cell (*e.g.*, copy number < 10), which requires an extremely high-  
309 binding avidity of a probe antibody. For this application, employing an antibody with high  
310 antigen-binding affinity (*e.g.*,  $K_D < 1$  nM) and a catenator with high homodimerization  
311 affinity (*e.g.*,  $(K_D)_{\text{catenator}} < 1$   $\mu$ M), would be necessary to overcome low proximity effect due  
312 to the scarcely present antigen molecules. Fourth, it might also be applied to antibody-based  
313 targeted cancer therapy where side effects arising from antibody binding to normal cells are a  
314 general problem. Since cancer-associated antigen molecules are lower in number on normal  
315 cells than they are on cancer cells, catenated anticancer antibodies would be concentrated on  
316 the surface of cancer cells, because the effective binding avidity of a <sup>cat</sup>Ab depends on the  
317 number of antigen molecules on a target surface. In particular, this approach would greatly  
318 reduce the intrinsic toxicity of antibody-drug conjugates that are widely used currently. Of  
319 note, a catenator fused to the C-terminus of Fc would not affect the effector functions of Fc  
320 through the Fc $\gamma$  receptor-binding site and FcRn binding site on it. We observed that <sup>cat</sup>Ab  
321 molecules could be internalized into HER2-positive cells presumably via receptor-mediated  
322 endocytosis (data not shown).

323           In conclusion, the presented strategy of the antibody catenation on a target surface is  
324 simple and powerful, and thus it could be widely applicable, although the homodimerization  
325 affinity of a catenator and the length of the linker need to be optimized case by case.  
326 Improvement of the simulation method will better guide the decision on the variables in  
327 constructing catenator-fused antibodies.

328



## 329 **Materials and Methods**

### 330 **MCMC simulation**

331 Simulation runs were carried out in the three steps stated below with specification of the  
332 target surface,  $K_D$  (for antibody-antigen interaction),  $(K_D)_{\text{catenator}}$  (for catenator-catenator  
333 interaction) and  $f(d)$  (effective local concentration of the catenator). In all simulations, the  
334 number of  $^{\text{cat}}\text{Ab}$  was far more than that of the binding sites, and therefore, the concentration  
335 of free  $^{\text{cat}}\text{Ab}$  was assumed to be the same as that of total  $^{\text{cat}}\text{Ab}$  (free  $^{\text{cat}}\text{Ab}$  + antigen-bound  
336  $^{\text{cat}}\text{Ab}$ ). Simulation parameters their set values are listed in Table 1.

#### 337 Step 1. Initialization step

- 338 1. A specified 3D target surface is implemented by assigning binding sites to specific  
339 locations on the surface.
- 340 2. Each binding site is set to be unoccupied.

#### 341 Step 2. MCMC stochastic update step

342 The following sub-steps (1-3) are iterated sufficient times to ensure thermodynamic  
343 equilibration.

- 344 1. A random binding site  $BSI$  is chosen from the target surface.
- 345 2. The binding status of  $BSI$  is updated.  
346 If  $BSI$  is unoccupied, its status is changed to the occupied status with the acceptance  
347 probability of  $\max(1, \frac{[^{\text{cat}}\text{Ab}]}{K_D})$ .  
348 If  $BSI$  is occupied, its status is changed to the unoccupied status with the acceptance  
349 probability of  $\max(1, \frac{K_D}{[^{\text{cat}}\text{Ab}]})$ .
- 350 3. An occupied binding site  $BS2$  right next to  $BSI$  is picked on the target surface, and the  
351 catenation status of the pair ( $BSI, BS2$ ) is updated.

352 If ( $BS_1, BS_2$ ) is uncatenated, and if both  $BS_1$  and  $BS_2$  have an unengaged catenator, its  
353 status is changed to the catenation status with the acceptance probability of  
354  $\max(1, \frac{f(d)}{(K_D)_{catenator}})$ .

355 If ( $BS_1, BS_2$ ) is catenated, its status is changed to the uncatenated status with the  
356 acceptance probability of  $\max(1, \frac{(K_D)_{catenator}}{f(d)})$

### 357 Step 3. Sampling step

358 1. The update step is stopped, and the final status of the target surface is recorded.

359 2. The total number of occupied and unoccupied binding sites are counted.

360

361 The codes for the model system and simulations are available in MATLAB and available on

362 Github ([https://github.com/JinyeopSong/Antibody\\_ThermoCalc\\_JY](https://github.com/JinyeopSong/Antibody_ThermoCalc_JY)). The detailed

363 description is provided in Readme.

364

### 365 **Preparation of antibodies and catenator-fused antibodies**

366 Each DNA fragment encoding heavy chain variable regions ( $V_H$ ) and light chain variable

367 regions ( $V_L$ ) of gICV30 were synthesized (IDT) and cloned into the pCEP4 vector

368 (Invitrogen). DNA fragments of  $C_{H1}$ - $C_{H2}$ - $C_{H3}$  of the gamma heavy chain and  $C_L$  of the kappa-

369 type light chain were inserted into the  $V_H$  and  $V_L$ , and the resulting vectors were named

370 gICV30 Hc and gICV30 Lc, respectively. DNA fragment encoding SDF-1 $\alpha$  was synthesized

371 (IDT) and cloned into the gICV30 Hc next to  $C_{H3}$  of gICV30 with (Gly-Gly-Gly-Gly-Ser)<sub>2</sub>

372 linker sequence (gICV30-SDF-1 $\alpha$  Hc). For antibody production, the three vectors were

373 amplified using the NucleoBond Xtra Midi kit (Macherey-Nagel), and a combination of the

374 gICV30 Hc and gICV30 Lc vectors or a combination of the gICV30-SDF-1 $\alpha$  Hc and gICV30

375 Lc vectors were introduced into the CHO-S cells (Gibco). The transfected cells were grown

376 in the ExpiCHO expression medium (Gibco) for ten days post-transfection. Supernatants  
377 were collected by centrifugation at 4 °C, filtered through 0.45 µm filters (Millipore), diluted  
378 by the addition of a binding buffer (150 mM NaCl, 20 mM Na<sub>2</sub>HPO<sub>4</sub>, pH 7.0) to a 1:1 ratio,  
379 loaded onto an open column containing Protein A resin (Sino Biological), and eluted with an  
380 elution buffer (0.1 M glycine, pH 3.0). The eluent was immediately neutralized by a  
381 neutralizing buffer (1M Tris-HCl, pH 8.5), and the antibodies were further purified using a  
382 HiLoad 26/60 Superdex 200 gel-filtration column (Cytiva) equilibrated with a buffer solution  
383 containing 20 mM Tris-HCl (pH 7.5) and 150 mM NaCl. For preparing  
384 Trastuzumab(N30A/H91A) and Trastuzumab(N30A/H91A)-SDF-1 $\alpha$ , each DNA fragment  
385 encoding V<sub>H</sub> and V<sub>L</sub>(N30A/H91A) of Trastuzumab was synthesized (IDT). The cloning,  
386 protein production and purification procedures were virtually identical to those used for  
387 gICV30 and gICV30-SDF-1 $\alpha$ .

388

### 389 **Bio-layer interferometry**

390 BLI experiments were performed to measure dissociation constants using an Octet R8  
391 (Sartorius). Biotinylated SARS-CoV-2 RBD (Acrobio system) or biotinylated Her2/ERBB2  
392 (Sino Biological) was loaded to a streptavidin biosensor tip (Sartorius) for 120 s. A baseline  
393 was determined by incubating the sensor with Kinetics Buffer (Sartorius) for 60 s. Antibody  
394 samples at different concentrations went through the association phase for 240 s and the  
395 dissociation phase for 720 s. All reactions were carried out in the Kinetics Buffer (Sartorius).  
396 The binding kinetics were analyzed using the Octet DataAnalysis 10.0 software (Sartorius) to  
397 deduce the kinetic parameters. Experiments were performed in triplicate for gICV30 and  
398 gICV30-SDF-1 $\alpha$  and duplicate for Trastuzumab(N30A/H91A) and  
399 Trastuzumab(N30A/H91A)-SDF-1 $\alpha$ .

400

401 **Figure preparation**

402 The computational models of an antibody and an antibody-catenator in Figure 1A were  
403 generated by using the ROSETTA software (Leman et al., 2020), and are presented by  
404 PyMOL (DeLano, 2004).

405

406 **ACKNOWLEDGMENTS**

407 This work was supported by the Samsung Research Funding & Incubation Center of  
408 Samsung Electronics under Project Number SRFC-MA2002-06.

409

410 **AUTHOR CONTRIBUTIONS**

411 B.-H.O. directed the work, and B.-S.J., J.S., W.C. and M.-J.A. further conceptualized the  
412 research. J.S. performed simulations. B.-S.J., S.-W.K. and S.-B.I. performed cloning and  
413 purification of the antibodies and the SARS-CoV-2 RBD. B.-H.O., J.S., B.-S.J. and W.C.  
414 wrote the original draft. All authors reviewed and accepted the final manuscript.

415

416 **DISCLOSURE OF INTEREST**

417 B.-H.O., B.-S.J., J.S., S.-B.I. and S.-W.K. are co-inventors in a patent application covering  
418 the antibody catenation method presented in this article.

419

## 420 REFERENCES

- 421 ALDEGHAITHER, D. S., ZAHAVI, D. J., MURRAY, J. C., FERTIG, E. J., GRAHAM, G. T., ZHANG, Y. W.,  
422 O'CONNELL, A., MA, J., JABLONSKI, S. A. & WEINER, L. M. 2019. A Mechanism of  
423 Resistance to Antibody-Targeted Immune Attack. *Cancer Immunol Res*, 7, 230-243.
- 424 AN, G., MI, Q., DUTTA-MOSCATO, J. & VODOVOTZ, Y. 2009. Agent-based models in translational  
425 systems biology. *Wiley Interdiscip Rev Syst Biol Med*, 1, 159-171.
- 426 CARTER, P. J. & LAZAR, G. A. 2018. Next generation antibody drugs: pursuit of the 'high-hanging  
427 fruit'. *Nature Reviews Drug Discovery*, 17, 197-223.
- 428 DELANO, W. L. 2004. Use of PYMOL as a communications tool for molecular science. *Abstracts of*  
429 *Papers of the American Chemical Society*, 228, U313-U314.
- 430 FOREMAN, K. W. 2017. A general model for predicting the binding affinity of reversibly and  
431 irreversibly dimerized ligands. *PLoS One*, 12, e0188134.
- 432 FU, F. & WANG, L. 2008. Coevolutionary dynamics of opinions and networks: from diversity to  
433 uniformity. *Phys Rev E Stat Nonlin Soft Matter Phys*, 78, 016104.
- 434 GOYDEL, R. S. & RADER, C. 2021. Antibody-based cancer therapy. *Oncogene*, 40, 3655-3664.
- 435 GRAZZINI, J., RICHIARDI, M. G. & TSIONAS, M. 2017. Bayesian estimation of agent-based models.  
436 *Journal of Economic Dynamics & Control*, 77, 26-47.
- 437 HANSEL, T. T., KROPSHOFER, H., SINGER, T., MITCHELL, J. A. & GEORGE, A. J. 2010. The safety and  
438 side effects of monoclonal antibodies. *Nat Rev Drug Discov*, 9, 325-38.
- 439 HASTINGS, W. K. 1970. Monte-Carlo Sampling Methods Using Markov Chains and Their  
440 Applications. *Biometrika*, 57, 97-&.
- 441 HOGARTH, P. M. & PIETERSZ, G. A. 2012. Fc receptor-targeted therapies for the treatment of  
442 inflammation, cancer and beyond. *Nat Rev Drug Discov*, 11, 311-31.
- 443 HOOGENBOOM, H. R. 2005. Selecting and screening recombinant antibody libraries. *Nat*  
444 *Biotechnol*, 23, 1105-16.
- 445 HOOTEN, M. B. & WIKLE, C. K. 2010. Statistical Agent-Based Models for Discrete Spatio-Temporal  
446 Systems. *Journal of the American Statistical Association*, 105, 236-248.
- 447 HURLBURT, N. K., SEYDOUX, E., WAN, Y. H., EDARA, V. V., STUART, A. B., FENG, J., SUTHAR, M. S.,  
448 MCGUIRE, A. T., STAMATATOS, L. & PANCERA, M. 2020. Structural basis for potent  
449 neutralization of SARS-CoV-2 and role of antibody affinity maturation. *Nat Commun*, 11,  
450 5413.
- 451 JIANG, X. R., SONG, A., BERGELSON, S., ARROLL, T., PAREKH, B., MAY, K., CHUNG, S., STROUSE, R.,  
452 MIRE-SLUIJ, A. & SCHENERMAN, M. 2011. Advances in the assessment and control of the  
453 effector functions of therapeutic antibodies. *Nat Rev Drug Discov*, 10, 101-11.
- 454 LEE, C. H., ROMAIN, G., YAN, W. P., WATANABE, M., CHARAB, W., TODOROVA, B., LEE, J., TRIPLETT,  
455 K., DONKOR, M., LUNGU, O. I., LUX, A., MARSHALL, N., LINDORFER, M. A., RICHARD-LE  
456 GOFF, O., BALBINO, B., KANG, T. H., TANNO, H., DELIDAKIS, G., ALFORD, C., TAYLOR, R. P.,

- 457 NIMMERJAHN, F., VARADARAJAN, N., BRUHNS, P., ZHANG, Y. J. & GEORGIU, G. 2017.  
458 IgG Fc domains that bind C1q but not effector Fc gamma receptors delineate the  
459 importance of complement-mediated effector functions (vol 18, pg 889, 2017). *Nature*  
460 *Immunology*, 18, 1173-1173.
- 461 LEMAN, J. K., WEITZNER, B. D., LEWIS, S. M., ADOLF-BRYFOGLE, J., ALAM, N., ALFORD, R. F.,  
462 APRAHAMIAN, M., BAKER, D., BARLOW, K. A., BARTH, P., BASANTA, B., BENDER, B. J.,  
463 BLACKLOCK, K., BONET, J., BOYKEN, S. E., BRADLEY, P., BYSTROFF, C., CONWAY, P.,  
464 COOPER, S., CORREIA, B. E., COVENTRY, B., DAS, R., DE JONG, R. M., DIMAIO, F., DSILVA, L.,  
465 DUNBRACK, R., FORD, A. S., FRENZ, B., FU, D. Y., GENIESSE, C., GOLDSCHMIDT, L.,  
466 GOWTHAMAN, R., GRAY, J. J., GRONT, D., GUFFY, S., HOROWITZ, S., HUANG, P. S., HUBER,  
467 T., JACOBS, T. M., JELIAZKOV, J. R., JOHNSON, D. K., KAPPEL, K., KARANICOLAS, J.,  
468 KHAKZAD, H., KHAR, K. R., KHARE, S. D., KHATIB, F., KHRAMUSHIN, A., KING, I. C.,  
469 KLEFFNER, R., KOEPNICK, B., KORTEMME, T., KUENZE, G., KUHLMAN, B., KURODA, D.,  
470 LABONTE, J. W., LAI, J. K., LAPIDOTH, G., LEAVER-FAY, A., LINDERT, S., LINSKY, T., LONDON,  
471 N., LUBIN, J. H., LYSKOV, S., MAGUIRE, J., MALMSTROM, L., MARCOS, E., MARCU, O.,  
472 MARZE, N. A., MEILER, J., MORETTI, R., MULLIGAN, V. K., NERLI, S., NORN, C., O'CONCHUIR,  
473 S., OLLIKAINEN, N., OVCHINNIKOV, S., PACELLA, M. S., PAN, X., PARK, H., PAVLOVICZ, R. E.,  
474 PETHE, M., PIERCE, B. G., PILLA, K. B., RAVEH, B., RENFREW, P. D., BURMAN, S. S. R.,  
475 RUBENSTEIN, A., SAUER, M. F., SCHECK, A., SCHIEF, W., SCHUELER-FURMAN, O., SEDAN, Y.,  
476 SEVY, A. M., SGOURAKIS, N. G., SHI, L., SIEGEL, J. B., SILVA, D. A., SMITH, S., SONG, Y., et al.  
477 2020. Macromolecular modeling and design in Rosetta: recent methods and frameworks.  
478 *Nat Methods*, 17, 665-680.
- 479 LIESE, S. & NETZ, R. R. 2018. Quantitative Prediction of Multivalent Ligand-Receptor Binding  
480 Affinities for Influenza, Cholera, and Anthrax Inhibition. *ACS Nano*, 12, 4140-4147.
- 481 LIU, L. 2018. Pharmacokinetics of monoclonal antibodies and Fc-fusion proteins. *Protein Cell*, 9,  
482 15-32.
- 483 MCLANE, A. J., SEMENIUK, C., MCDERMID, G. J. & MARCEAU, D. J. 2011. The role of agent-based  
484 models in wildlife ecology and management. *Ecological Modelling*, 222, 1544-1556.
- 485 METZCAR, J., WANG, Y., HEILAND, R. & MACKLIN, P. 2019. A Review of Cell-Based Computational  
486 Modeling in Cancer Biology. *JCO Clin Cancer Inform*, 3, 1-13.
- 487 PECKYS, D. B., HIRSCH, D., GAISER, T. & DE JONGE, N. 2019. Visualisation of HER2 homodimers in  
488 single cells from HER2 overexpressing primary formalin fixed paraffin embedded tumour  
489 tissue. *Molecular Medicine*, 25.
- 490 PERC, M., JORDAN, J. J., RAND, D. G., WANG, Z., BOCCALETTI, S. & SZOLNOKI, A. 2017. Statistical  
491 physics of human cooperation. *Physics Reports-Review Section of Physics Letters*, 687, 1-  
492 51.
- 493 SAXTON, M. J. & JACOBSON, K. 1997. Single-particle tracking: applications to membrane

- 494 dynamics. *Annu Rev Biophys Biomol Struct*, 26, 373-99.
- 495 SCOTT, A. M., WOLCHOK, J. D. & OLD, L. J. 2012. Antibody therapy of cancer. *Nat Rev Cancer*, 12,
- 496 278-87.
- 497 SLAGA, D., ELLERMAN, D., LOMBANA, T. N., VIJ, R., LI, J., HRISTOPOULOS, M., CLARK, R.,
- 498 JOHNSTON, J., SHELTON, A., MAI, E., GADKAR, K., LO, A. A., KOERBER, J. T., TOTPAL, K.,
- 499 PRELL, R., LEE, G., SPIESS, C. & JUNTILLA, T. T. 2018. Avidity-based binding to HER2 results
- 500 in selective killing of HER2-overexpressing cells by anti-HER2/CD3. *Sci Transl Med*, 10.
- 501 SLIWKOWSKI, M. X. & MELLMAN, I. 2013. Antibody Therapeutics in Cancer. *Science*, 341, 1192-
- 502 1198.
- 503 VELDKAMP, C. T., PETERSON, F. C., PELZEK, A. J. & VOLKMAN, B. F. 2005. The monomer-dimer
- 504 equilibrium of stromal cell-derived factor-1 (CXCL 12) is altered by pH, phosphate, sulfate,
- 505 and heparin. *Protein Science*, 14, 1071-1081.
- 506 WANG, S. Y., XIE, K. & LIU, T. F. 2021. Cancer Immunotherapies: From Efficacy to Resistance
- 507 Mechanisms - Not Only Checkpoint Matters. *Frontiers in Immunology*, 12.
- 508 WEINER, L. M., SURANA, R. & WANG, S. 2010. Monoclonal antibodies: versatile platforms for
- 509 cancer immunotherapy. *Nat Rev Immunol*, 10, 317-27.
- 510 WHITE, A. L., DOU, L., CHAN, H. T. C., FIELD, V. L., MOCKRIDGE, C. I., MOSS, K., WILLIAMS, E. L.,
- 511 BOOTH, S. G., FRENCH, R. R., POTTER, E. A., BUTTS, C., AL-SHAMKHANI, A., CRAGG, M. S.,
- 512 VERBEEK, J. S., JOHNSON, P. W. M., GLENNIE, M. J. & BEERS, S. A. 2014. Fc gamma
- 513 Receptor Dependency of Agonistic CD40 Antibody in Lymphoma Therapy Can Be
- 514 Overcome through Antibody Multimerization. *Journal of Immunology*, 193, 1828-1835.
- 515 ZHOU, H. X. 2001. Loops in proteins can be modeled as worm-like chains. *Journal of Physical*
- 516 *Chemistry B*, 105, 6763-6766.

517

518

## 519 **FIGURE LEGENDS**

### 520 **Figure 1. The concept of antibody catenation on a target surface by fusion of a catenator.**

521 (A) Molecular model for catenator-fused antibodies. A flexible linker (Gly-Gly-Ser) between  
522 Fc and the catenator and the hinge segment between Fc and Fab were modeled by using the  
523 ROSETTA software. The catenator is an  $\alpha$ -helical hairpin that forms four-helix anti-parallel  
524 coiled coils (PDB entry: 1ROP). The structure of Fc was derived from the IgG1 antibody  
525 (PDB entry: 1IGY) and that of Fab from an antibody against the receptor-binding domain of  
526 the SARS-CoV-2 spike protein (PDB entry: 6XE1).

527 (B) Decreased dissociation by antibody catenation. Pairs of  $^{\text{cat}}$ Ab-antigen complexes adjacent  
528 to each other can be catenated, and the  $^{\text{cat}}$ Ab molecules are increasingly harder to dissociate  
529 from each other with increased catenation. The effective antigen-binding avidity would  
530 increase owing to a decreased off rate of  $^{\text{cat}}$ Ab.

531

### 532 **Figure 2. ABM for simulating the binding dynamics of a catenator-fused antibody.**

533 (A) (Left) Each binding site is composed of two antigen molecules (2Ag). (Right) The grey  
534 circles indicate the sphere sampled by the catenator, and  $V_{\text{overlap}}$  is the overlapping volume  
535 between the adjacent spheres. Catenation between two  $^{\text{cat}}$ Ab molecules is possible only in  
536  $V_{\text{overlap}}$ .

537 (B) The three rules of the ABM model. (Left)  $^{\text{cat}}$ Ab-2Ag binding occurs with a relative  
538 likelihood,  $[^{\text{cat}}\text{Ab}]/K_D$ . (Middle) The catenation between adjacent  $^{\text{cat}}$ Ab-2Ag complexes  
539 occurs with an indicated relative likelihood,  $f(d)/(K_D)_{\text{Catenator}}$ , determined by  $(K_D)_{\text{Catenator}}$  and  
540 the inter-complex distance  $d$ . (Right) It was assumed that  $^{\text{cat}}$ Ab molecules that are catenated  
541 cannot dissociate from the surface.



542 (C) The simulation requires specification of the parameters for the binding site, antibody and  
543 catenator. Through the MCMC sampling, the state of binding sites on the target surface is  
544 iteratively updated with the ABM rules and eventually sampled. A sufficient number of  
545 sampling results are collected to quantify the binding occupancy and the effective  
546 dissociation constant.

547

548 **Figure 3. Simulations of the binding site occupancy and  $(K_D)_{\text{eff}}$  in response to  $(K_D)_{\text{catenator}}$ .**

549 (Left) Binding site occupancy. The simulations were carried out for a square array of the  
550 binding sites. The values for a set of variables were  $K_D = 10^{-8}$  M,  $[\text{catAb}] = 10^{-9}$  M, reach  
551 length = 7 nm, spacing between the binding sites = 12 nm and the number of total binding  
552 sites = 98. The mean value and standard deviations of 1024 MCMC simulations for each  
553  $(K_D)_{\text{catenator}}$  value are shown in blue, and the data are shown as a scatter plot of representative  
554 runs (orange).

555 (Right) The effective dissociation constant. The data shown on the left were converted into  
556 the  $(K_D)_{\text{eff}}$  values. The dashed line represents the  $K_D$  value for the same antibody without a  
557 catenator. The maximum fold enhancement of the effective binding avidity, which is  
558 equivalent to the reduction of  $(K_D)_{\text{eff}}$ , is 70.6.

559

560 **Figure 4. Simulations for different arrays of the binding sites.**

561 (A) Comparison for regularly distributed binding sites. Three different regular arrays of the  
562 binding sites are shown at the top. The black dots represent the binding sites and grey lines  
563 the connectable pairs by the catenators. The red circles and the blue lines represent the  
564 maximum range of catenation and the connectivity number, respectively, for a given binding  
565 site. Binding site occupancy and  $(K_D)_{\text{eff}}$  in response to  $(K_D)_{\text{catenator}}$  are shown at the bottom.

566 1024 trials were sampled for each  $(K_D)_{\text{catenator}}$  value and the results are plotted. The variables  
567 were  $K_D = 10^{-8}$  M,  $[\text{cat Ab}] = 10^{-9}$  M, reach length = 7 nm, spacing between the binding sites = 12  
568 nm, and the number of total binding sites were 98 for the square array and 102 for hexagonal  
569 and triangular array, respectively. The numbers on the right are the maximum fold  
570 enhancement of the effective binding avidity for each array.

571 **(B)** Comparison for randomly distributed binding sites. Three random arrays of the binding  
572 sites with different binding site density ( $\rho$ ) are shown at the top. The surface area for the  
573 simulation was  $5,760 \text{ nm}^2$ . The simulation conditions were the same as in (A). Binding site  
574 occupancy and  $(K_D)_{\text{eff}}$  in response to  $(K_D)_{\text{catenator}}$  are plotted as in (A).

575

576 **Figure 5. BLI runs demonstrating the effect of catenation on the binding avidity.**

577 The binding kinetics were measured with the indicated targets immobilized on a sensor tip.  
578 The concentration of the antibodies was varied as shown. The experimental signals and fitted  
579 curves are shown in red and black, respectively. For curve fitting, 1:1 binding was assumed.  
580 The kinetic parameters are shown in the insets.  $k_a$ , association rate constant;  $k_d$ , dissociation  
581 rate constant.

582 **(A)** High-affinity antibody. Trastuzumab(N30A/H91A) exhibited the  $K_D$  of 2.1 nM for the  
583 immobilized ectodomain of HER2.

584 **(B)** Low-affinity antibody. gICV30 exhibits the  $K_D$  of 51.2 nM for the immobilized RBD of  
585 SARS-CoV-2. For both Trastuzumab(N30A/H91A)-SDF-1 $\alpha$  and gICV30-SDF-1 $\alpha$ , the  $K_D$   
586 values could not be accurately determined due to the instrumental insensitivity ( $K_D < 10$  pM).

587 The experiments were performed in triplicates, and representative sensorgrams are shown.

588

589 **Figure supplements**

590 **Figure 2—figure supplement 1. Calculation of  $f(d)$  using uniform local density**  
591 **approximation.**

592 The forward catenation rate at which two catenators dimerize is proportional to the  
593 volumetric overlap ( $V(d)$ ) between the effective concentration of the catenator, which is  
594 assumed to be uniformly distributed over a sphere defined by the reach length ( $L$ ).  $V(d)$   
595 depends on the distance ( $d$ ) between the two adjacent <sup>cat</sup>Ab-2Ag complexes as well as the  
596 reach length. Shown on the left is a plot of  $f(d)$  as a function of  $d$  calculated for the indicated  
597 reach length ( $L$ ).

598

599 **Figure 4—figure supplement 1. Simulations for randomly distributed, high-density**  
600 **binding sites.**

601 1024 trials were sampled for each  $(K_D)_{\text{catenator}}$  value at the indicated density and the results are  
602 plotted. The variables were  $K_D = 10^{-8}$  M,  $[\text{catAb}] = 10^{-9}$  M, reach length= 7 nm, spacing  
603 between the binding sites= 12 nm, and the surface area= 5,760 nm<sup>2</sup>. The maximum fold  
604 enhancement of the effective binding avidity and  $(K_D)_{\text{catenator},50}$  are tabulated at the bottom.

605

606 **Figure 4—figure supplement 2. Influence of the likelihood of intrinsic antigen binding**  
607 **( $[\text{catAb}]/K_D$ ) on binding site occupancy and  $(K_D)_{\text{eff}}$ .**

608 **(A)** The binding occupancy and **(B)** The effective dissociation constant  $(K_D)_{\text{eff}}$  in response to  
609  $[\text{catAb}]/K_D$  for  $[\text{catAb}]/K_D = 1.0, 0.3, 0.1, 0.03, 0.01$ . The simulations were carried out with a  
610 square array of the binding sites as in Figure 3. The set values for the variable parameters  
611 were  $[\text{catAb}] = 10^{-9}$  M, reach length= 7 nm, spacing between the binding sites= 12 nm and the  
612 number of total binding sites= 98. The mean binding occupancy of 1024 MCMC simulations  
613 was plotted.  $(K_D)_{\text{catenator}}$  was varied from 3 mM to 30 nM. The antibody binding avidity is  
614 substantially enhanced across a broad range of  $[\text{catAb}]/K_D$ .

615

616 **Table 1. Simulation specifications**

617 The definition and values of the parameters used in the presented simulations are tabulated:

| Parameters                                          | Description                             | Values                                        |
|-----------------------------------------------------|-----------------------------------------|-----------------------------------------------|
| <b>Specification of <sup>cat</sup>Ab</b>            |                                         |                                               |
| $K_D$                                               | Dissociation constant of antibody       | 10 nM                                         |
| $(K_D)_{\text{catenator}}$                          | Dissociation constant of catenator      | 10 nM-10 mM                                   |
| $[\text{catAb}]$                                    | Antibody concentration                  | 1 nM                                          |
| $l$                                                 | Length of the flexible linker           | 6 nm                                          |
| $c$                                                 | Length of the catenator                 | 2 nm                                          |
| $L$                                                 | Reach length ( $l+c/2$ )                | 7 nm                                          |
| <b>Specification of the target surface</b>          |                                         |                                               |
| $N_{\text{total\_binding\_sites}}$<br>(in Fig. 3,4) | Number of antibody-binding sites        | 98 - 102                                      |
| Connectivity number<br>(in Fig. 3,4)                | Number of possible catenation           | 3 (Hexagonal)<br>4 (Square)<br>6 (Triangular) |
| $d$ (in Fig. 3,4)                                   | Distance between adjacent binding sites | 12 nm                                         |
| $L_{\text{surface}}$ (in Fig. 4)                    | Surface area of the target surface      | 40 nm <sup>2</sup>                            |
| Binding site density<br>(in Fig. 4)                 | Surface density of the binding sites    | 1.47-11.76<br>(per 7x7 nm <sup>2</sup> )      |
| <b>Specification of Simulation</b>                  |                                         |                                               |
| Updates/MCMC step                                   | Number of updates in one MCMC step      | 30,000-100,000                                |
| Sampling size                                       | Number of sampling for a parameter set  | 1,024                                         |

618

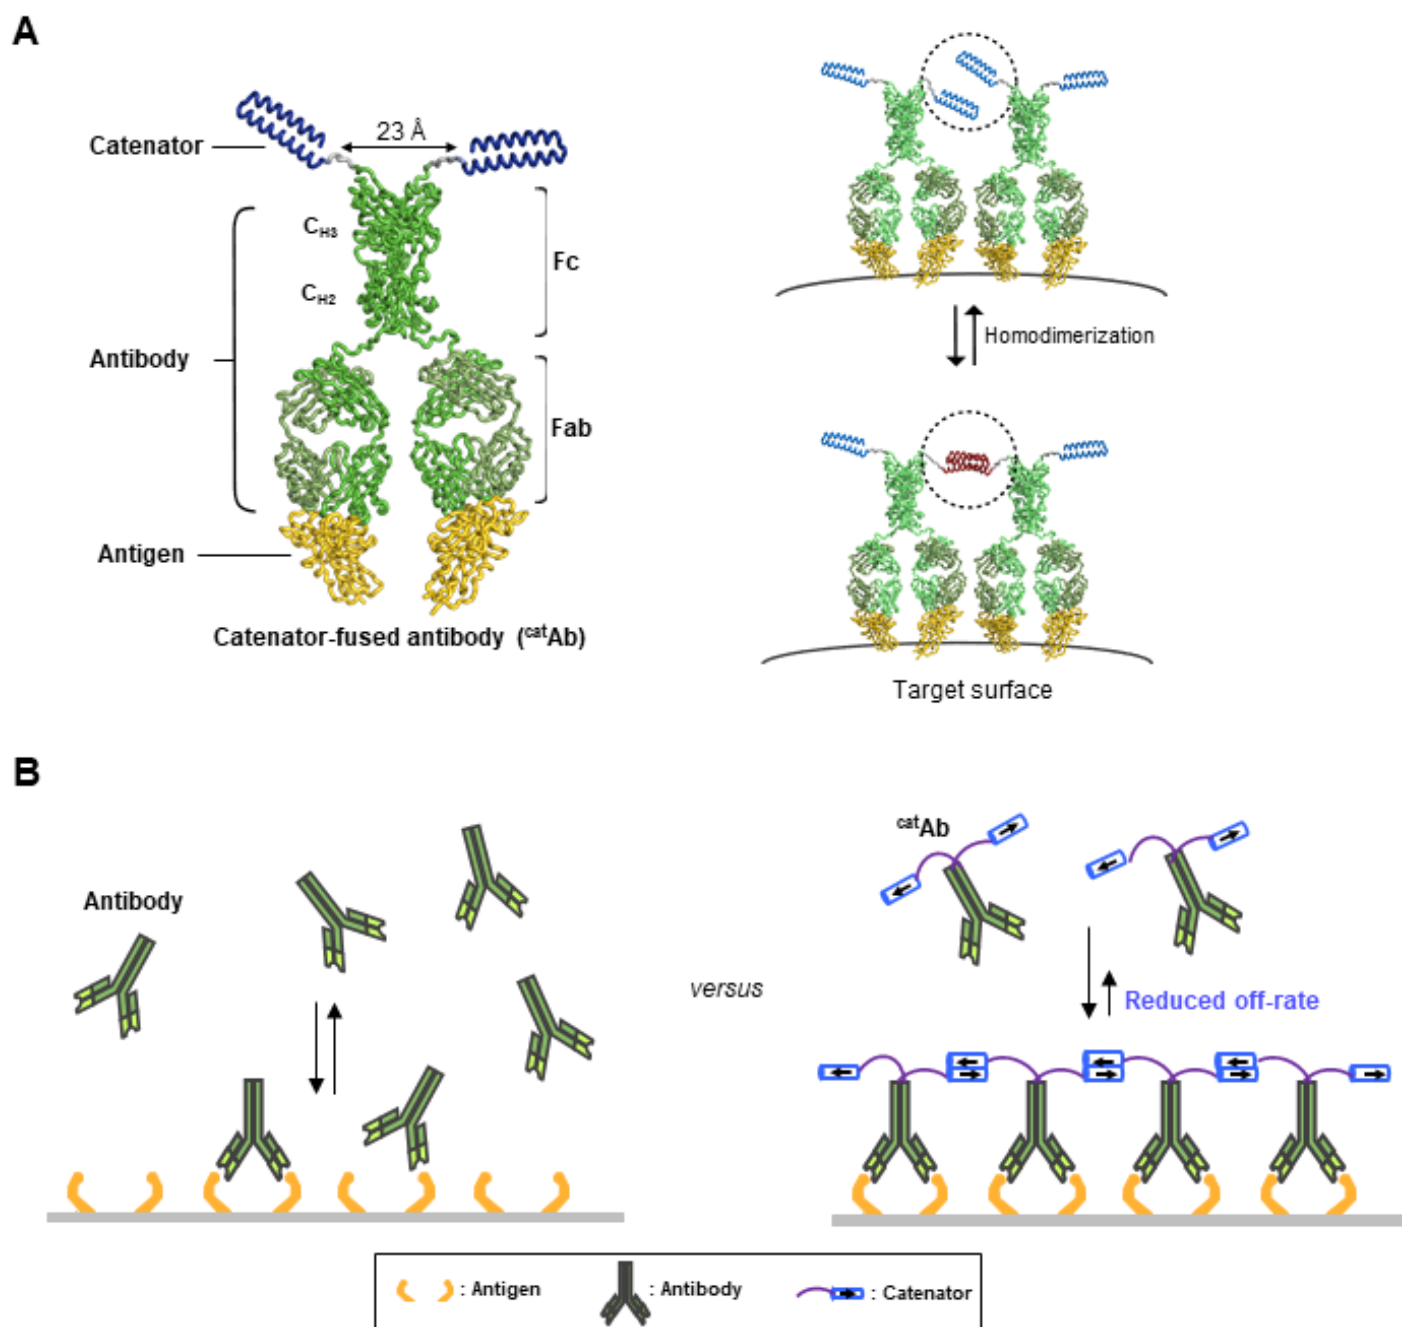

Figure 1

## A Conditions for catenation

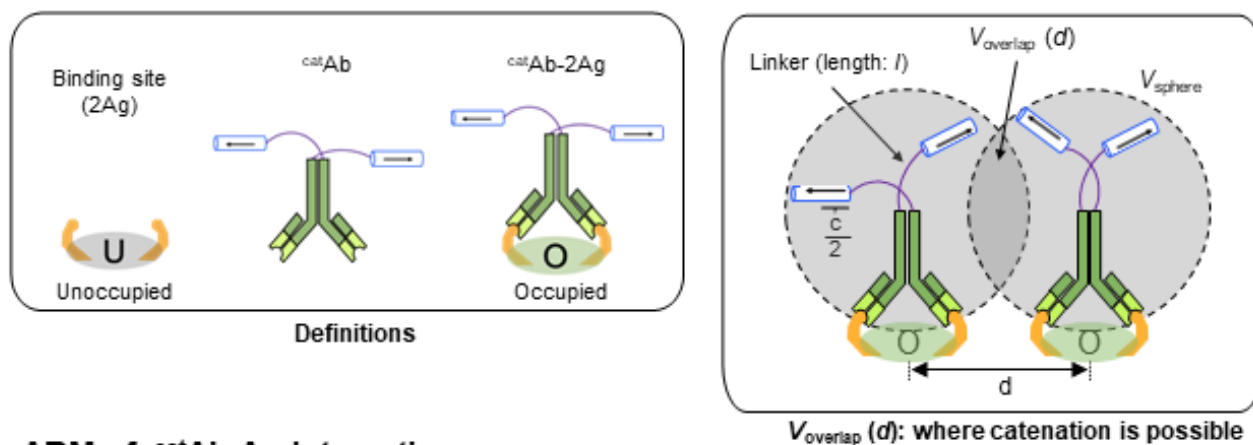

## B ABM of catAb-Ag interaction

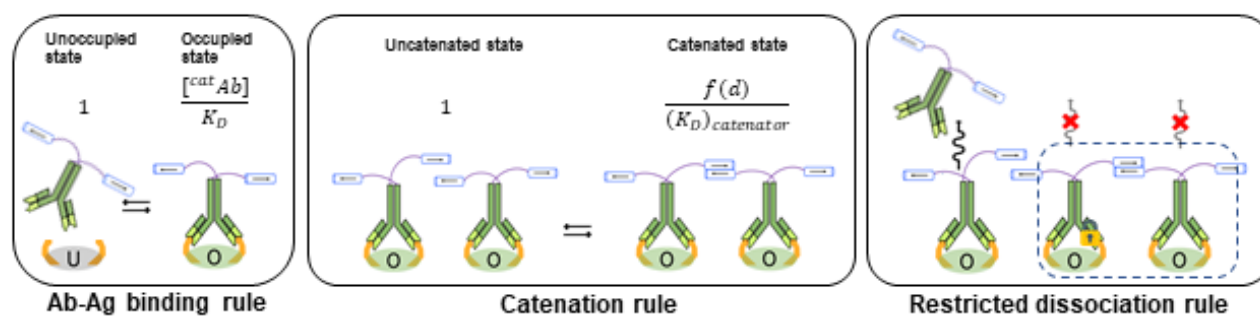

## C Simulation procedure

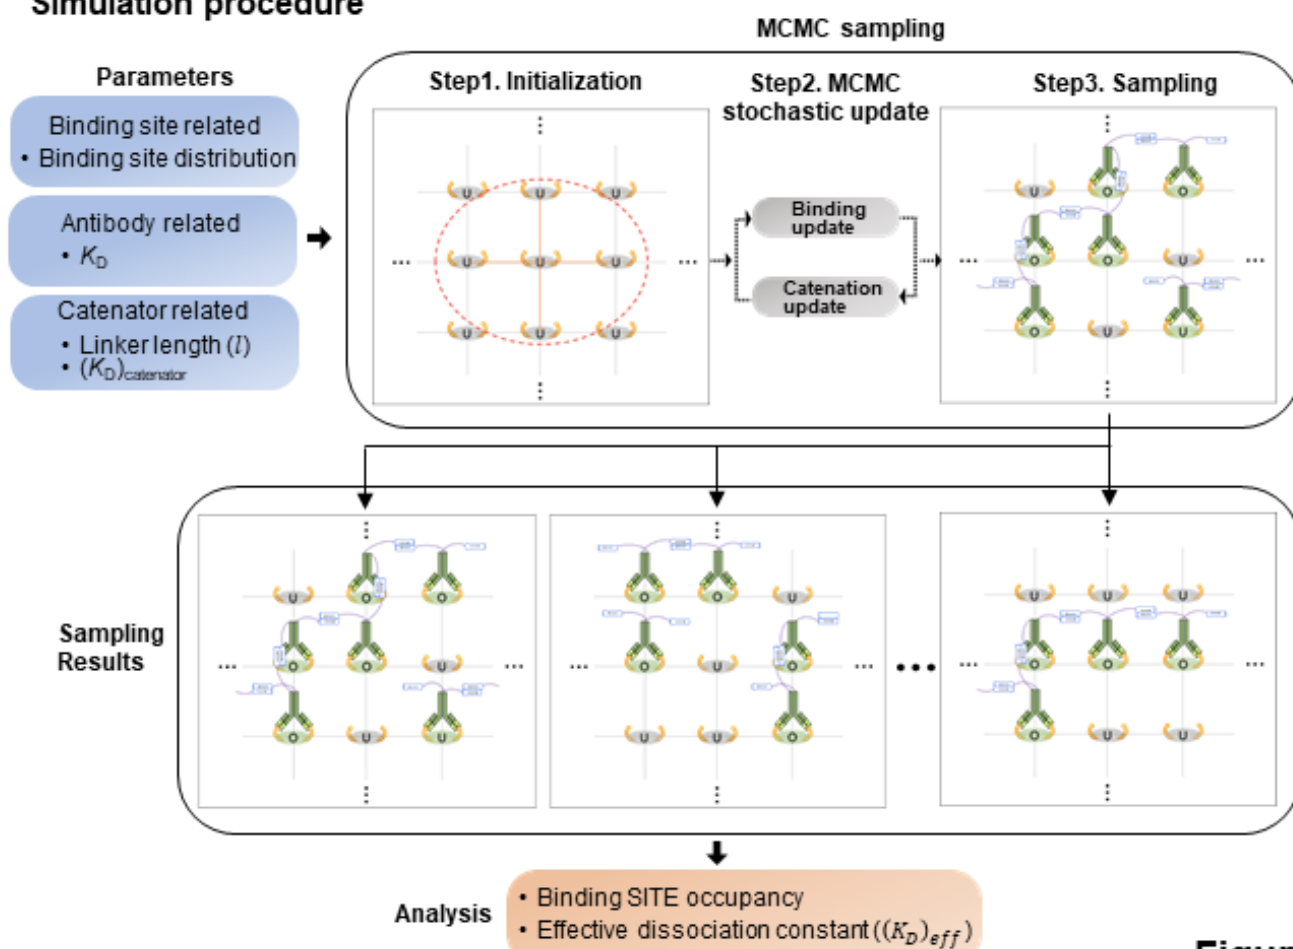

Figure 2

**A**

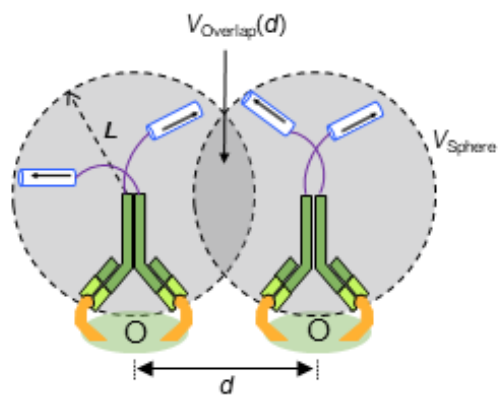

$$f(d) = \frac{1}{N_A} \times \left( \frac{1}{V_{\text{Sphere}}} \right)^2 \times V_{\text{Overlap}}(d)$$

**B**

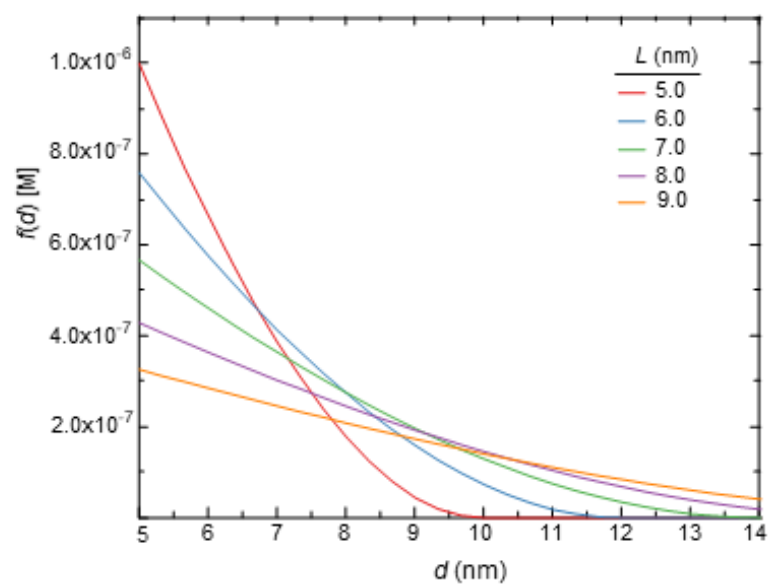

**Figure 2—figure supplement 1**

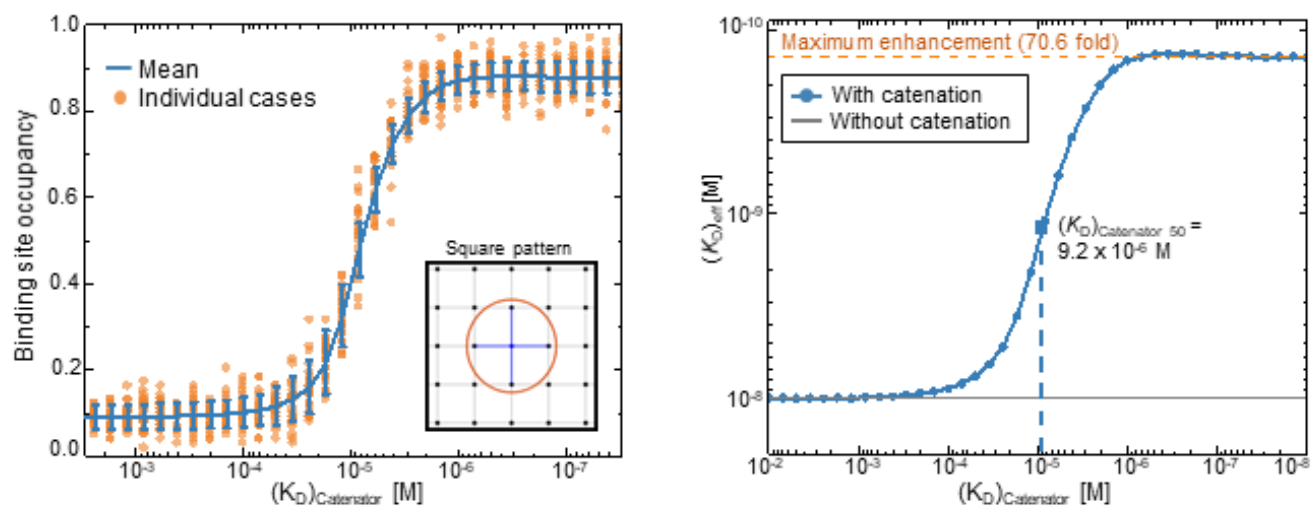

Figure 3



**A**

**Regularly spaced binding sites**

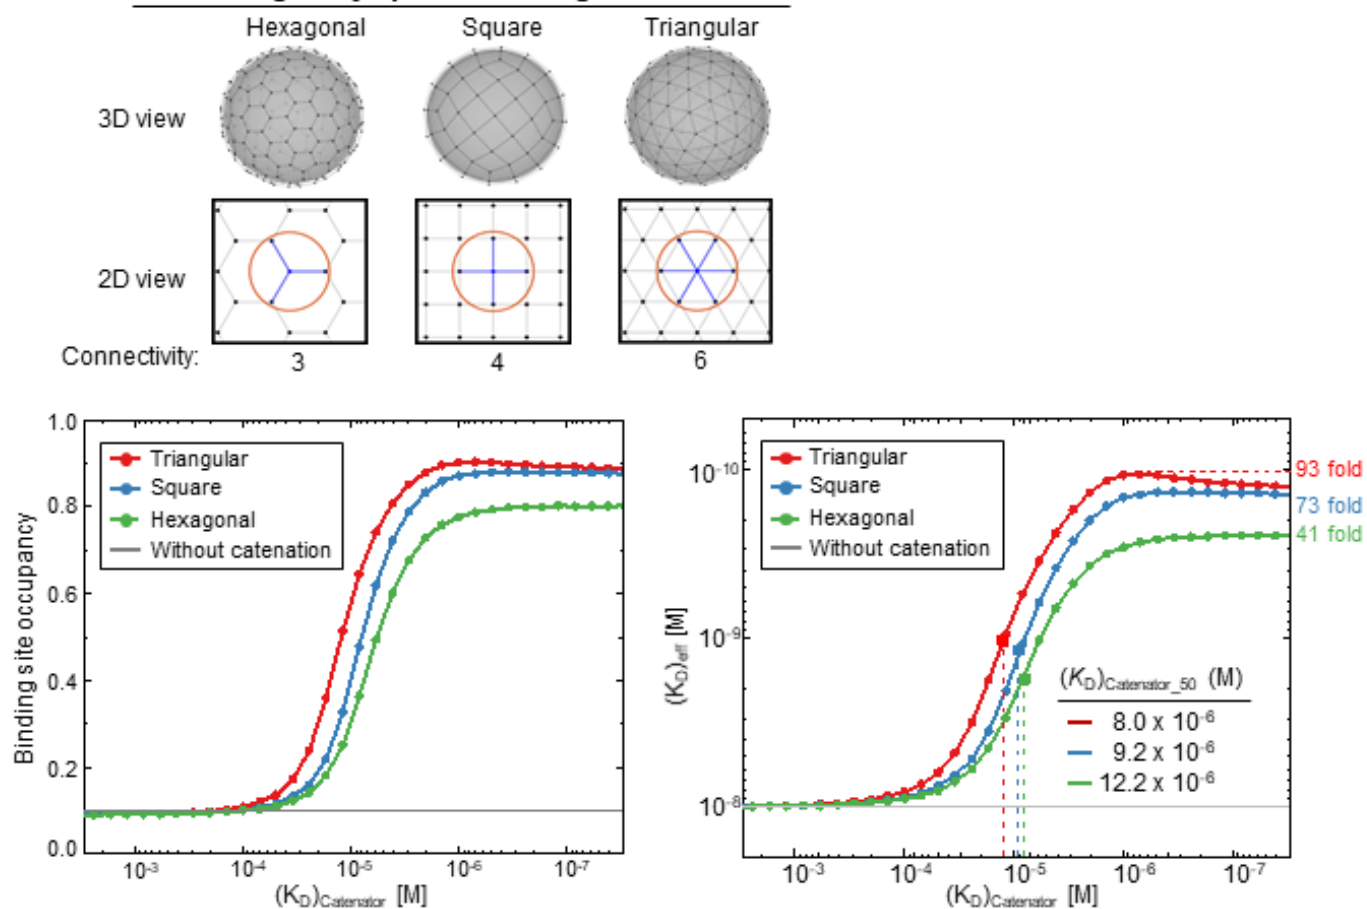

**B**

**Irregularly spaced binding sites**

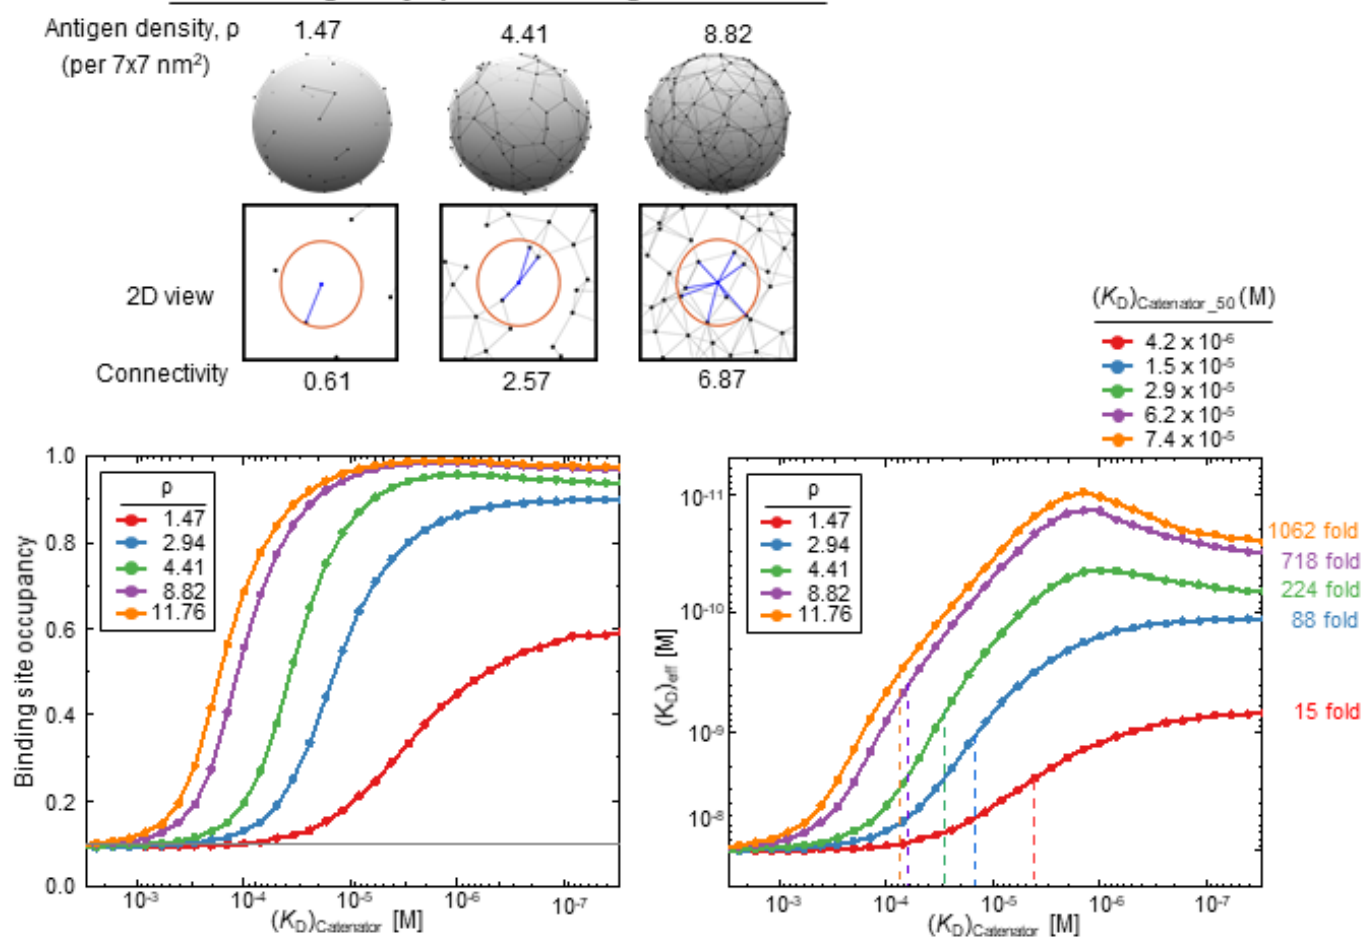

**Figure 4**

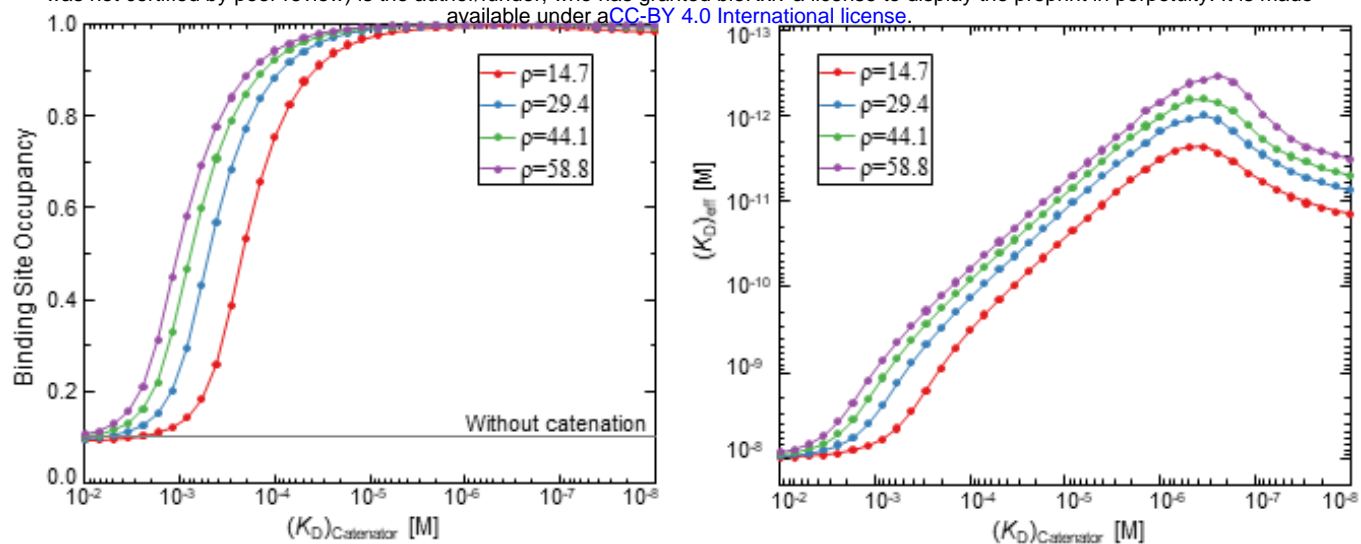

| $\rho$ | Maximum enhancement | $(K_D)_{\text{Catenator},50}$ (M) |
|--------|---------------------|-----------------------------------|
| 14.7   | 4256.7              | $5.25 \cdot 10^{-5}$              |
| 29.4   | 9986.3              | $8.50 \cdot 10^{-5}$              |
| 44.1   | 15401.4             | $9.00 \cdot 10^{-5}$              |
| 58.8   | 28988.2             | $9.50 \cdot 10^{-5}$              |

$\rho$ : Number of binding sites per  $7 \times 7 \text{ nm}^2$

Figure 4—figure supplement 1

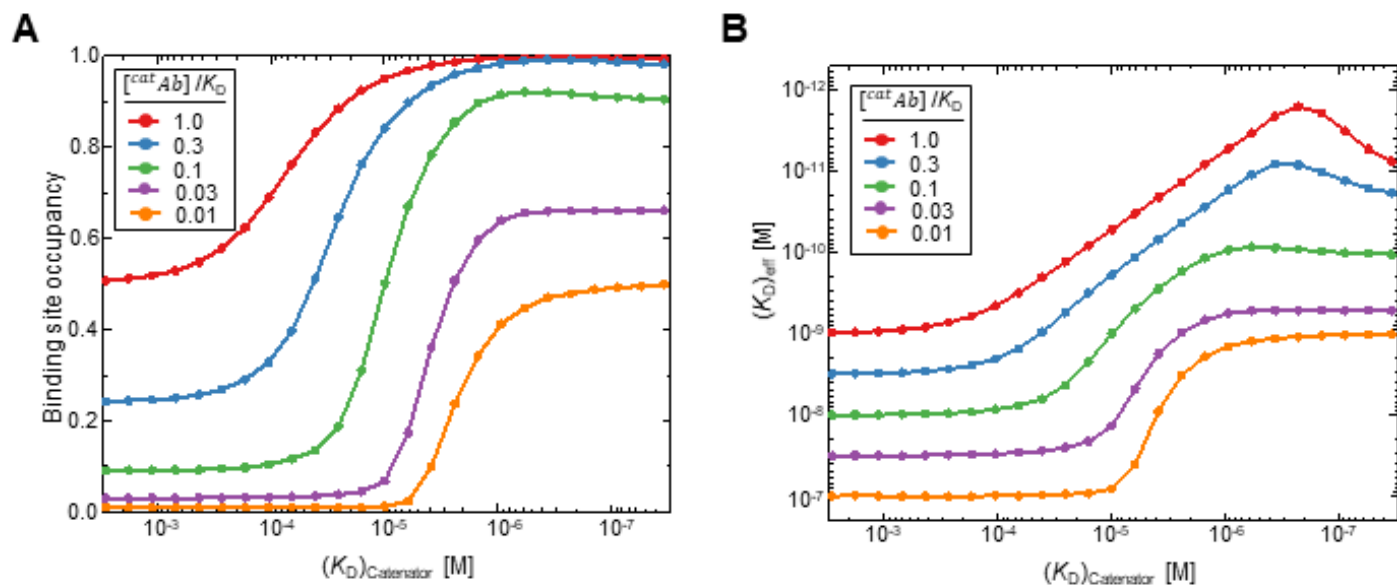

Figure 4—figure supplement 2

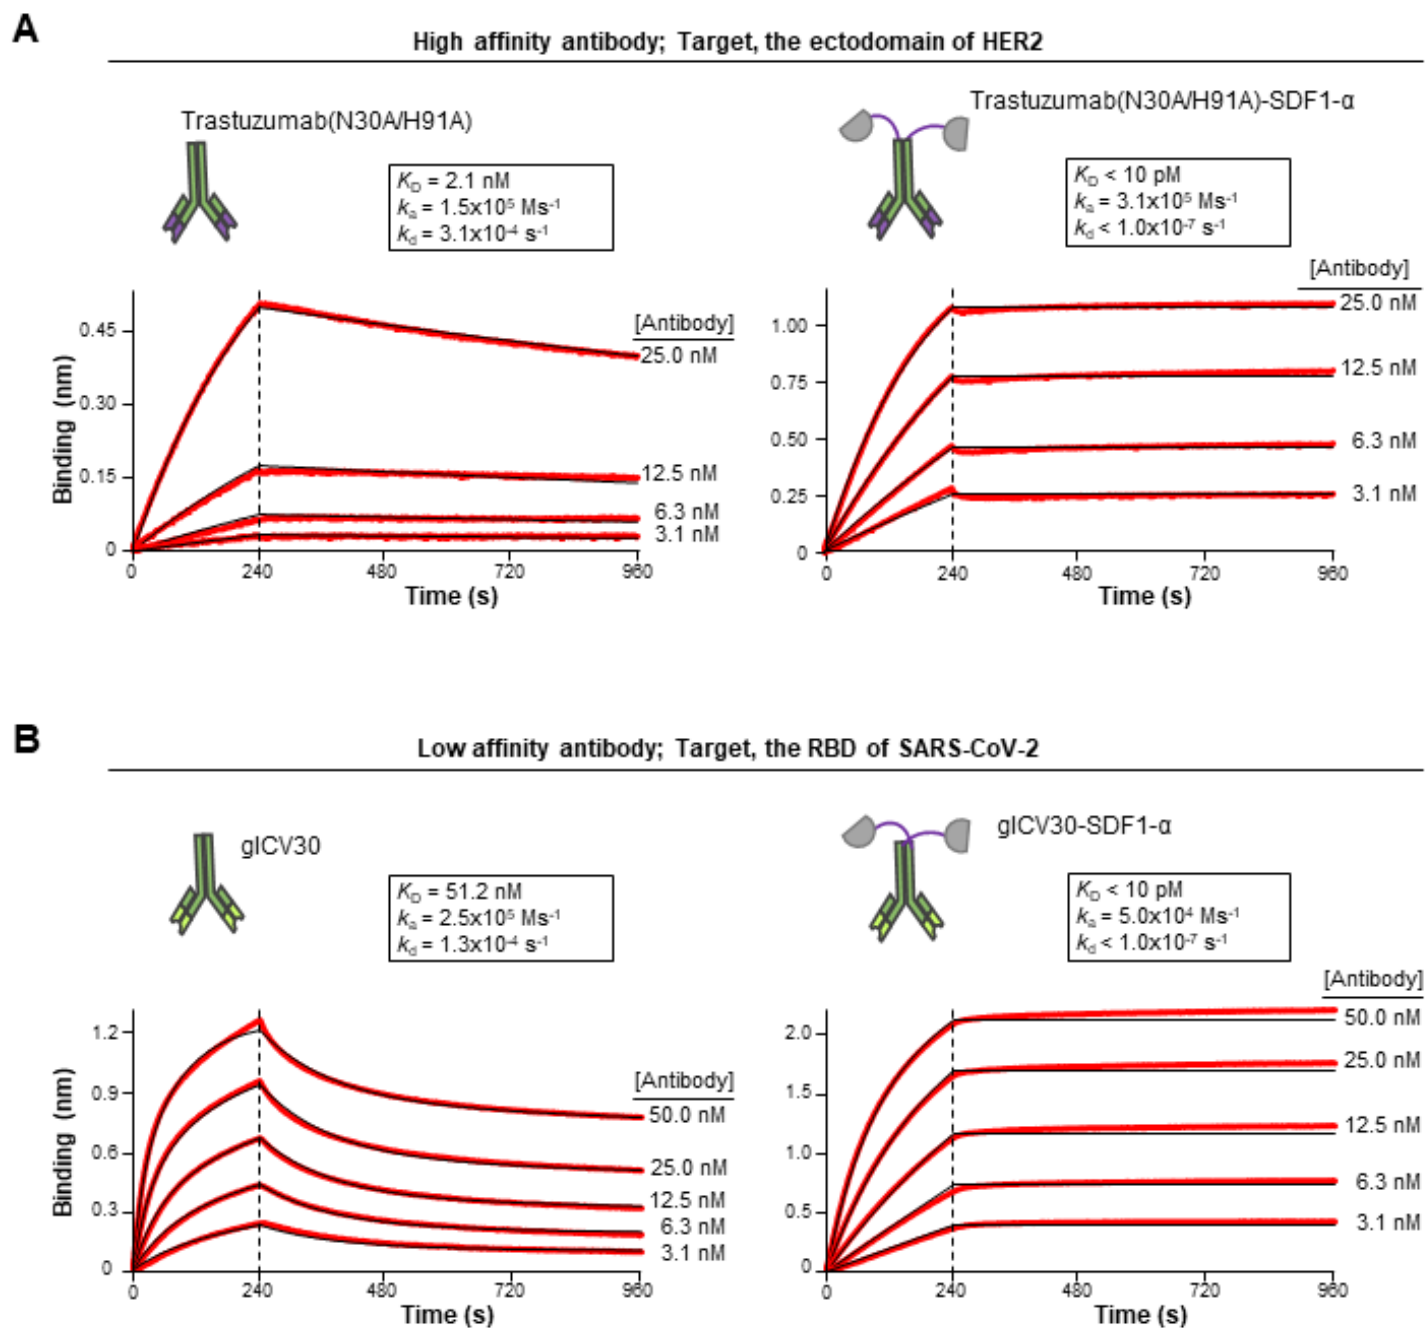

Figure 5
